# Supplementary material
Source: Royal Society of Chemistry journal article supplement (doi:10.1039/d6fo00876c)
Supplement: d6fo00876c1.pdf [file d6fo00876c1.pdf]

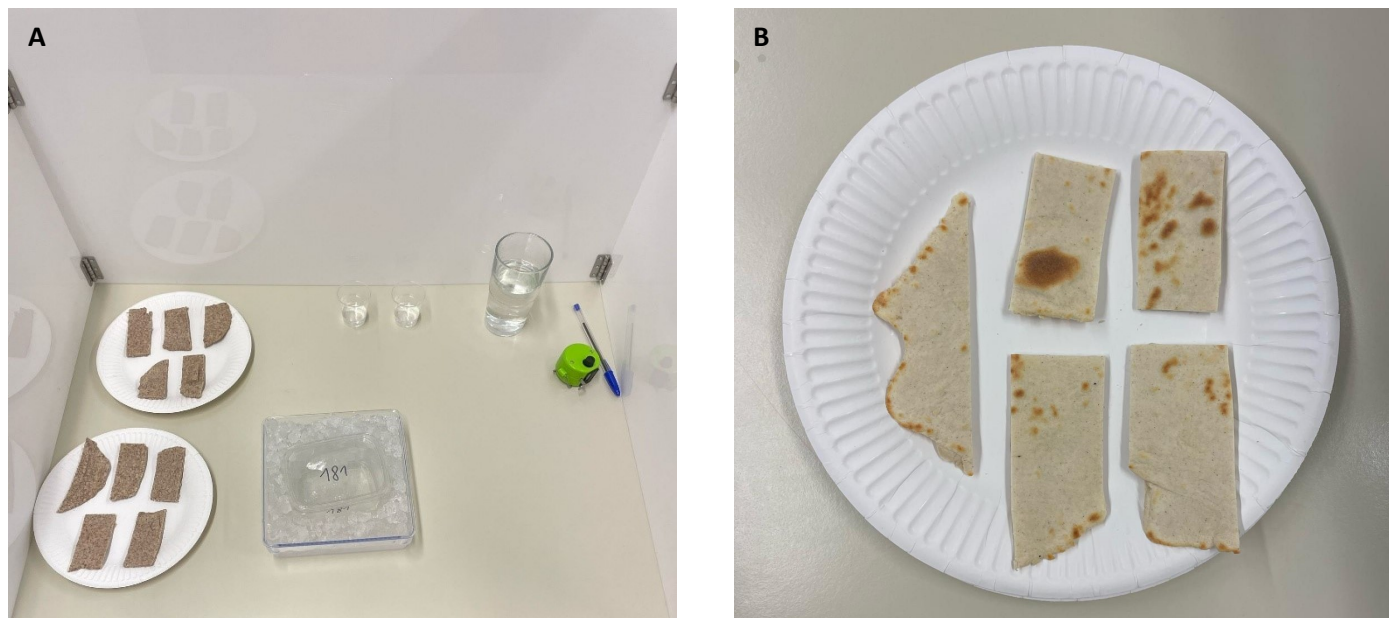

**Figure 1.** (A) Sensory booth setup used during the *in vivo* mastication study, and (B) example of five portions of wraps supplied to participants.
