# Supplementary material
Source: Royal Society of Chemistry journal article supplement (doi:10.1039/d6fo00876c)
Supplement: d6fo00876c2.pdf [file d6fo00876c2.pdf]

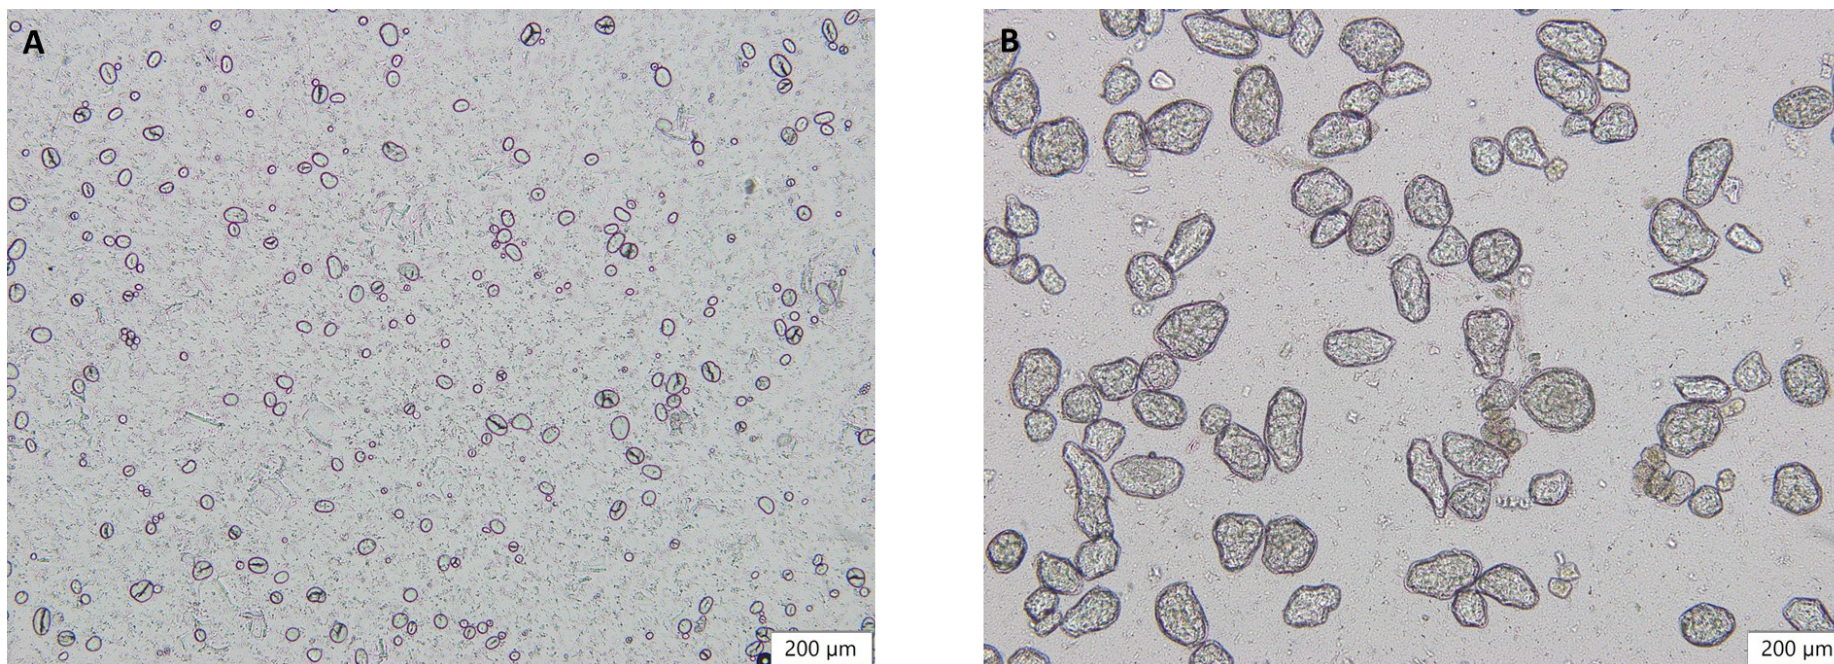

**Figure 1.** Microscopic pictures (magnification 10x, scalebar 200 μm) of raw-milled, reference (A) and cellular (B) Epic red bean flour.
