# Supplementary material
Source: Royal Society of Chemistry journal article supplement (doi:10.1039/d6fo00876c)
Supplement: d6fo00876c3.pdf [file d6fo00876c3.pdf]

**Table 1.** Pearson correlation coefficients (black) and p-values (grey) for bolus weight, chewing time, number of chews and level of starch hydrolysis upon *in vivo* mastication of wraps consisting of 100% raw-milled, reference red bean flour (100B<sub>ref</sub>), 80% reference and 20% cellular red bean flour (80B<sub>ref</sub>\_20B<sub>cell</sub>) or 80% wheat flour and 20% cellular bean flour (80W<sub>ref</sub>\_20B<sub>cell</sub>).

|                                                                     | <b>Bolus weight</b><br>100B <sub>ref</sub> | <b>Bolus weight</b><br>80B <sub>ref</sub> _20B <sub>cell</sub> | <b>Bolus weight</b><br>80W <sub>ref</sub> _20B <sub>cell</sub> | <b>Chewing time</b><br>100B <sub>ref</sub> | <b>Chewing time</b><br>80B <sub>ref</sub> _20B <sub>cell</sub> | <b>Chewing time</b><br>80W <sub>ref</sub> _20B <sub>cell</sub> | <b>Numbers of chews</b><br>100B <sub>ref</sub> | <b>Number of chews</b><br>80B <sub>ref</sub> _20B <sub>cell</sub> | <b>Number of chews</b><br>80W <sub>ref</sub> _20B <sub>cell</sub> | <b>Starch hydrolysis</b><br>100B <sub>ref</sub> | <b>Starch hydrolysis</b><br>80B <sub>ref</sub> _20B <sub>cell</sub> | <b>Starch hydrolysis</b><br>80W <sub>ref</sub> _20B <sub>cell</sub> |
|---------------------------------------------------------------------|--------------------------------------------|----------------------------------------------------------------|----------------------------------------------------------------|--------------------------------------------|----------------------------------------------------------------|----------------------------------------------------------------|------------------------------------------------|-------------------------------------------------------------------|-------------------------------------------------------------------|-------------------------------------------------|---------------------------------------------------------------------|---------------------------------------------------------------------|
| <b>Bolus weight</b><br>100B <sub>ref</sub>                          | 1.0000<br><.0001                           |                                                                |                                                                |                                            |                                                                |                                                                |                                                |                                                                   |                                                                   |                                                 |                                                                     |                                                                     |
| <b>Bolus weight</b><br>80B <sub>ref</sub> _20B <sub>cell</sub>      | 0.7413<br><.0001                           | 1.0000<br><.0001                                               |                                                                |                                            |                                                                |                                                                |                                                |                                                                   |                                                                   |                                                 |                                                                     |                                                                     |
| <b>Bolus weight</b><br>80W <sub>ref</sub> _20B <sub>cell</sub>      | 0.7433<br><.0001                           | 0.8873<br><.0001                                               | 1.0000<br><.0001                                               |                                            |                                                                |                                                                |                                                |                                                                   |                                                                   |                                                 |                                                                     |                                                                     |
| <b>Chewing time</b><br>100B <sub>ref</sub>                          | 0.3266<br>0.0454                           | 0.1713<br>0.3039                                               | 0.1308<br>0.4339                                               | 1.0000<br><.0001                           |                                                                |                                                                |                                                |                                                                   |                                                                   |                                                 |                                                                     |                                                                     |
| <b>Chewing time</b><br>80B <sub>ref</sub> _20B <sub>cell</sub>      | 0.1632<br>0.3275                           | 0.2393<br>0.1479                                               | 0.1871<br>0.2607                                               | 0.6866<br><.0001                           | 1.0000<br><.0001                                               |                                                                |                                                |                                                                   |                                                                   |                                                 |                                                                     |                                                                     |
| <b>Chewing time</b><br>80W <sub>ref</sub> _20B <sub>cell</sub>      | 0.2097<br>0.2063                           | 0.2058<br>0.2151                                               | 0.3001<br>0.0672                                               | 0.4165<br>0.0093                           | 0.5800<br>0.0001                                               | 1.0000<br><.0001                                               |                                                |                                                                   |                                                                   |                                                 |                                                                     |                                                                     |
| <b>Numbers of chews</b><br>100B <sub>ref</sub>                      | 0.4124<br>0.0101                           | 0.2704<br>0.1007                                               | 0.2859<br>0.0819                                               | 0.7661<br><.0001                           | 0.5570<br>0.0003                                               | 0.4279<br>0.0074                                               | 1.0000<br><.0001                               |                                                                   |                                                                   |                                                 |                                                                     |                                                                     |
| <b>Number of chews</b><br>80B <sub>ref</sub> _20B <sub>cell</sub>   | 0.1457<br>0.3829                           | 0.1723<br>0.3008                                               | 0.1599<br>0.3377                                               | 0.5166<br>0.0009                           | 0.7685<br><.0001                                               | 0.5484<br>0.0004                                               | 0.7189<br><.0001                               | 1.0000<br><.0001                                                  |                                                                   |                                                 |                                                                     |                                                                     |
| <b>Number of chews</b><br>80W <sub>ref</sub> _20B <sub>cell</sub>   | 0.3100<br>0.0582                           | 0.3410<br>0.0362                                               | 0.4179<br>0.00907                                              | 0.4427<br>0.0054                           | 0.6063<br><.0001                                               | 0.7338<br><.0001                                               | 0.6080<br><.0001                               | 0.7896<br><.0001                                                  | 1.0000<br><.0001                                                  |                                                 |                                                                     |                                                                     |
| <b>Starch hydrolysis</b><br>100B <sub>ref</sub>                     | 0.6287<br><.0001                           | 0.6394<br><.0001                                               | 0.5893<br><.0001                                               | 0.2585<br>0.1171                           | 0.3131<br>0.0556                                               | 0.1298<br>0.4374                                               | 0.3718<br>0.0215                               | 0.2648<br>0.1082                                                  | 0.3143<br>0.0546                                                  | 1.0000<br><.0001                                |                                                                     |                                                                     |
| <b>Starch hydrolysis</b><br>80B <sub>ref</sub> _20B <sub>cell</sub> | 0.4105<br>0.0105                           | 0.6810<br><.0001                                               | 0.6142<br><.0001                                               | 0.0902<br>0.5903                           | 0.2788<br>0.0901                                               | 0.2491<br>0.1315                                               | 0.2058<br>0.2151                               | 0.2610<br>0.1134                                                  | 0.3435<br>0.0347                                                  | 0.7467<br><.0001                                | 1.0000<br><.0001                                                    |                                                                     |
| <b>Starch hydrolysis</b><br>80W <sub>ref</sub> _20B <sub>cell</sub> | 0.4327<br>0.0067                           | 0.5320<br>0.0006                                               | 0.5806<br>0.0001                                               | 0.1160<br>0.4881                           | 0.3815<br>0.0181                                               | 0.3350<br>0.0398                                               | 0.2403<br>0.1462                               | 0.3101<br>0.0582                                                  | 0.3419<br>0.0357                                                  | 0.6573<br><.0001                                | 0.7336<br><.0001                                                    | 1.0000<br><.0001                                                    |
